# Supplementary material for: Design and Construction of Cu(OH)2/Ni3S2 Composite Electrode on Cu Foam by Two-Step Electrodeposition
Source: MDPI journal article supplement (doi:10.3390/mi13020237), 2022-01-30
Supplement: s1 [file s1]

# Design and Construction of $\text{Cu}(\text{OH})_2/\text{Ni}_3\text{S}_2$ Composite Electrode on Cu Foam by Two-Step Electrodeposition

Sa Lv \*, Wenshi Shang, Huan Wang, Xuefeng Chu, Yaodan Chi, Chao Wang, Jia Yang, Peiyu Geng and Xiaotian Yang \*

Key Laboratory for Comprehensive Energy Saving of Cold Regions Architecture of Ministry of Education, Jilin Provincial Key Laboratory of Architectural Electricity & Comprehensive Energy Saving, Jilin Jianzhu University, Changchun 130118, China; shangws0426@163.com; wanghuan@jlju.edu.cn; stone2009@126.com; chiyaodan@jlju.edu.cn; wangchao@jlju.edu.cn; yangjia@jlju.edu.cn; gengpeiyu1@163.com

\* Correspondence: lvsa82@163.com (S.L.); hanyxt@163.com (X.Y.); Tel.: +86-0431-8456-6181 (S.L.)

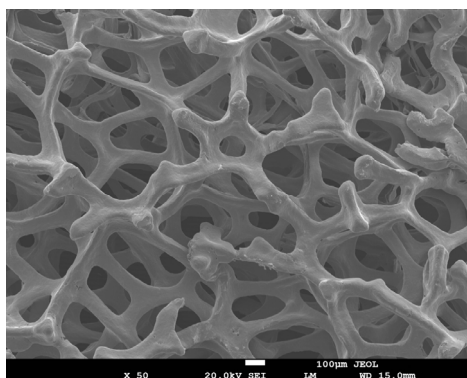

**Figure S1.** FE-SEM image of pristine Cu foam.

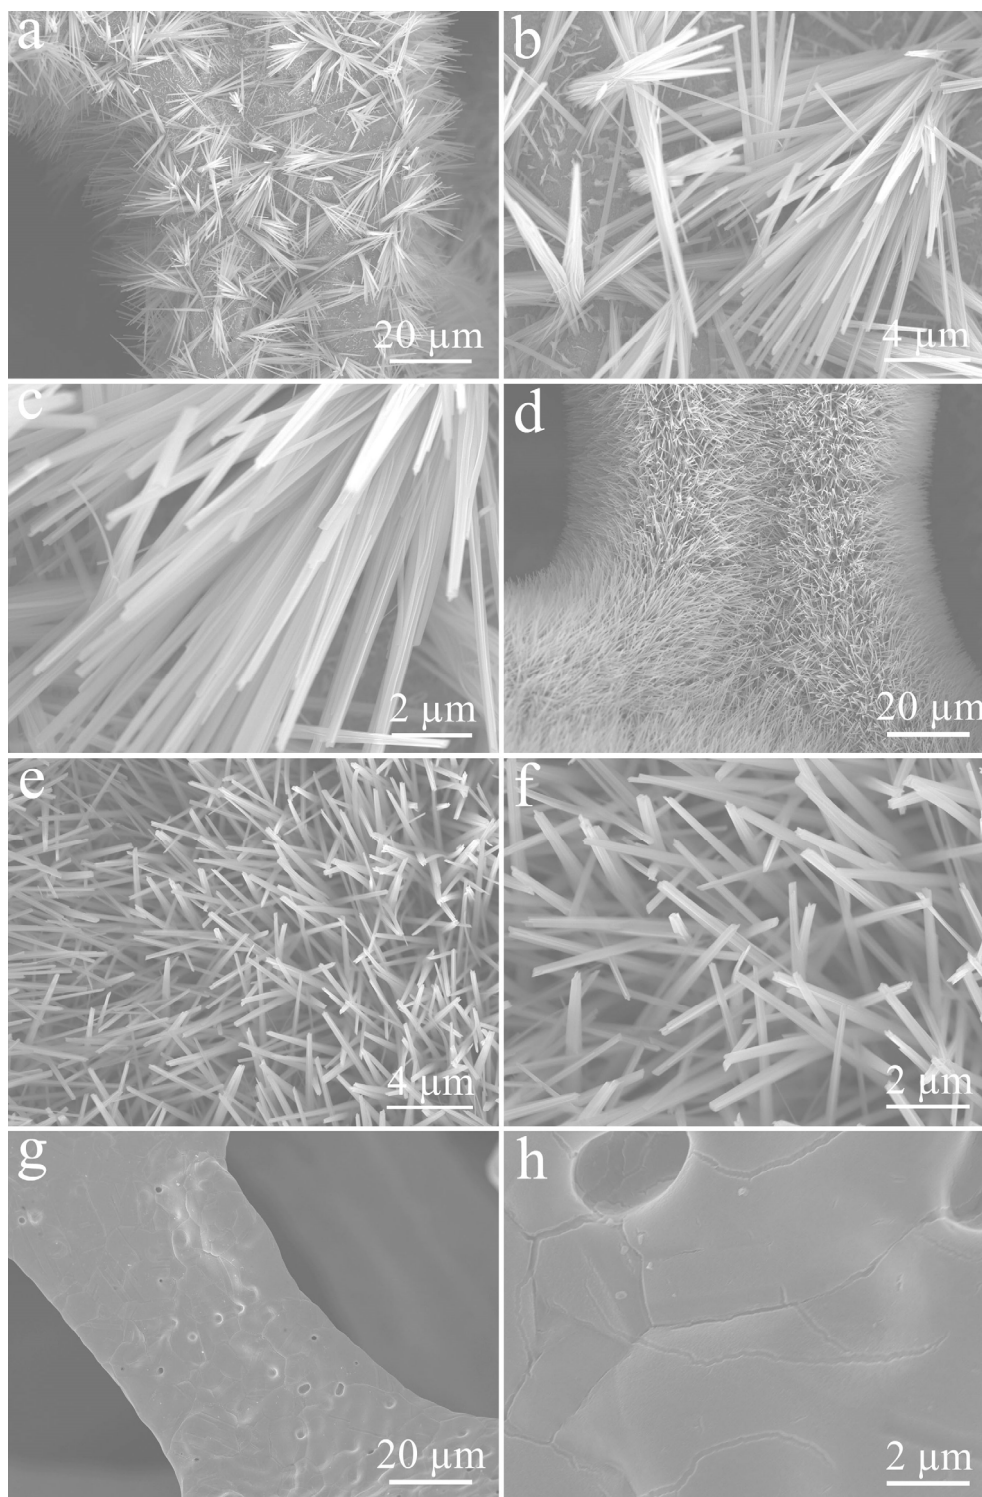

**Figure S2.** FE-SEM images of  $\text{Cu}(\text{OH})_2$  formed on Cu foam substrate at different current densities: **(a-c)**  $0.01 \text{ A cm}^{-2}$ ; **(d-f)**  $0.025 \text{ A cm}^{-2}$ ; **(g-h)**  $0.075 \text{ A cm}^{-2}$ .

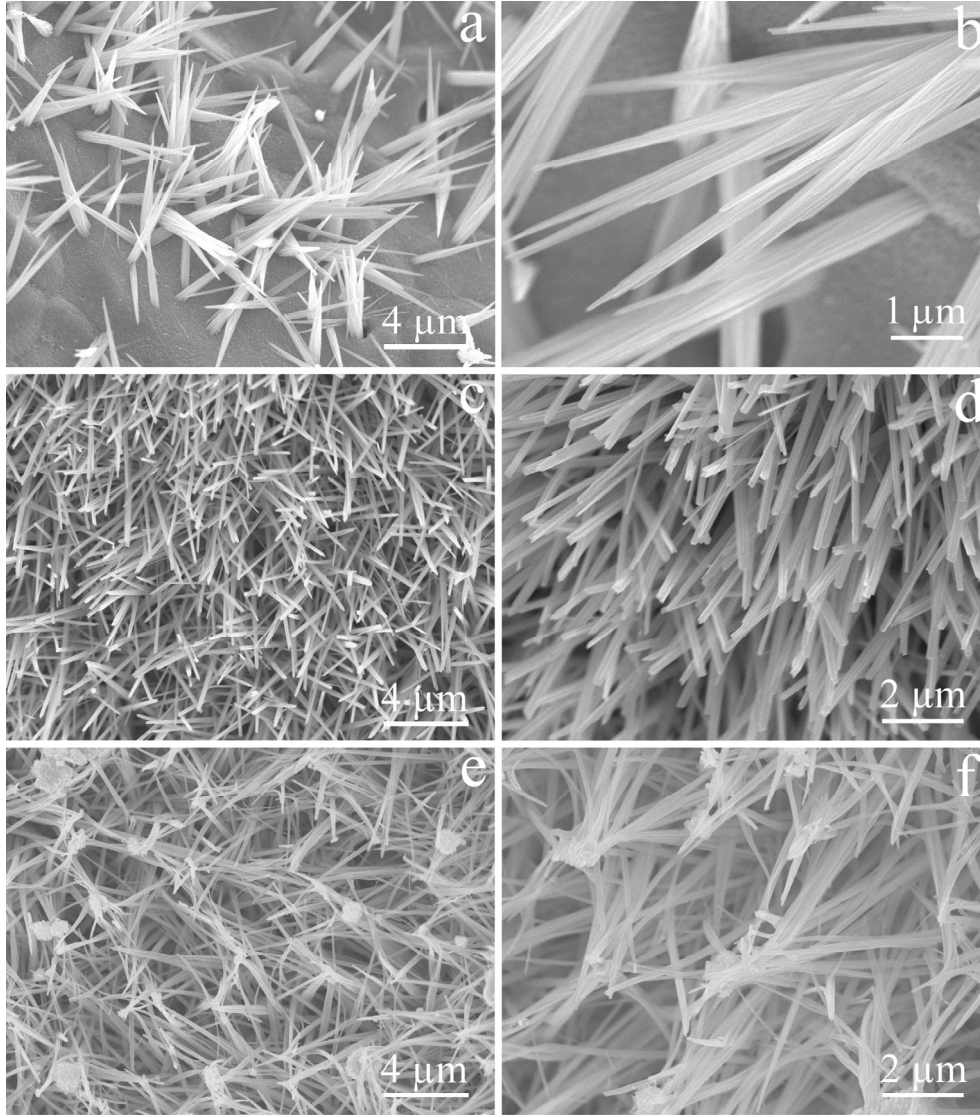

**Figure S3.** FE-SEM images of  $\text{Cu(OH)}_2$  formed on Cu foam substrate at different electrodeposition time: **(a-b)** 1 min ; **(c-d)** 5 min; **(e-f)** 1 h.

The areal capacitance of  $\text{Cu(OH)}_2/\text{Ni}_3\text{S}_2$  electrode is calculated according to the equation:

$$C_s = \frac{I \times \Delta t}{S \Delta V}$$

where  $C_s$  ( $\text{F cm}^{-2}$ ) is the specific capacitance,  $I$  (A) is the charge–discharge current,  $\Delta t$  (s) is the discharging time,  $S$  ( $\text{cm}^2$ ) is the effective area of the electrode and  $\Delta V$  (V) represents the potential drop during discharge.
